# Supplementary material
Source: PubMed Central journal article supplement (PMC4422360)
Supplement: supp_fj.14-257501_Supplemental_Figure1.pdf [file supp_fj.14-257501_Supplemental_Figure1.pdf]

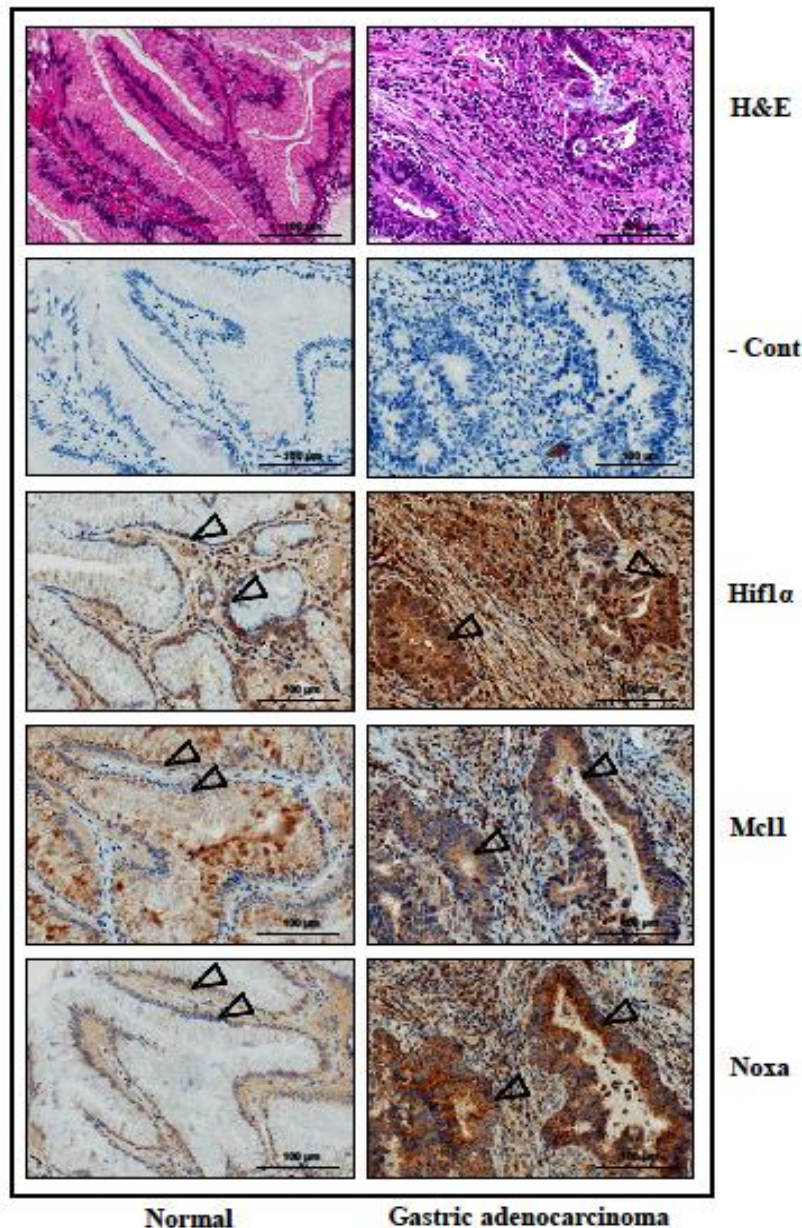

**Supplemental Fig.S1.** Expression of Hif1 $\alpha$ , Noxa as well as Mcl1 in human gastric surgery samples from adenocarcinoma patients as well as from nonneoplastic gastric tissues. Immunohistochemical staining of human gastric adenocarcinoma surgery samples from patients with known history of *H. pylori* infection (n=4) showing up-regulation of Hif1 $\alpha$ , Noxa as well as Mcl1. Negative (-ve) control (-Cont) contained no primary antibody. ▲ indicates epithelial lining and gastric mucosa. Original magnification: X20. Scale 100  $\mu$ m.
