# Supplementary material
Source: PubMed Central journal article supplement (PMC4422360)
Supplement: supp_fj.14-257501_Supplemental_Figure3.pdf [file supp_fj.14-257501_Supplemental_Figure3.pdf]

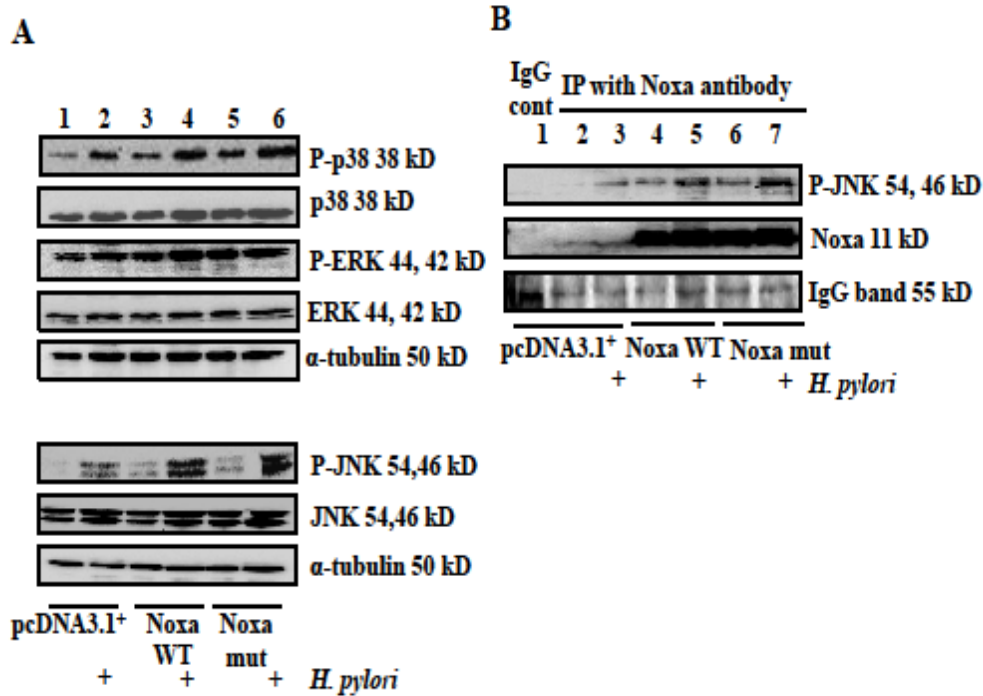

**Supplemental Fig. S3.** Noxa induced JNK activation and enhanced interaction with P-JNK following infection with *H. pylori*. **A)** Effect of overexpression of WT and non-phosphorylatable mutant (S13A) constructs of Noxa on MAP kinases was assessed by western blot analysis in AGS cells after transfecting cells with above mentioned constructs followed by 200 MOI *H. pylori* infection for 5 h.  $\alpha$ -tubulin was used as a loading control. **B)** Immunoprecipitation of whole cell lysates prepared from infected or uninfected empty vector or WT Noxa or S13A Noxa-transfected cells with Noxa antibody showed interaction of P-JNK with Noxa.
