# Supplementary material
Source: PubMed Central journal article supplement (PMC4422360)
Supplement: supp_fj.14-257501_Supplemental_Figure4.pdf [file supp_fj.14-257501_Supplemental_Figure4.pdf]

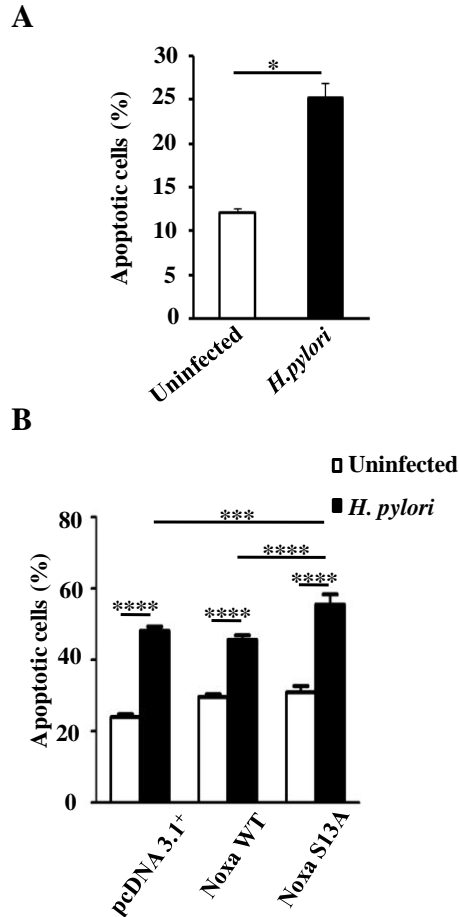

**Supplemental Fig. S4.** Nonphosphorylated Noxa enhances *H. pylori*-induced cell death in AGS cells. **A)** Analysis of the data shown in Figure. 6A by Student's t test clearly demonstrated significant increase in percentage apoptotic cell death in the *H. pylori*-infected cells (mean  $\pm$  SEM,  $n=6$ ),  $*P<0.05$ . **B)** The percentage of apoptotic cell death in various transfected groups were compared with two way ANOVA with Tukey's *post hoc* test. (mean $\pm$ SEM,  $n =6$ ),  $***P<0.001$ ,  $****P<0.0001$ .
